# Supplementary material
Source: publisher site journal article supplement (https://www.spandidos-publications.com/1146/downloadSupplementary)

Figure S1. Summary of the anti-inflammatory role of PPB in glial cells. PPB inhibited the transcription of proinflammatory mediators (iNOS and COX-2) and cytokines (TNF- $\alpha$ , IL-1 $\beta$  and IL-6) by suppressing NF- $\kappa$ B and mitogen-activated protein kinase pathway activation in LPS-stimulated glial cells. PPB, *Prunus persica* methanol extract; iNOS, inducible nitric oxide synthase; COX-2, cyclooxygenase-2; TNF, tumor necrosis factor; IL, interleukin; LPS, lipopolysaccharide; p, phosphorylation, I, inhibitor.

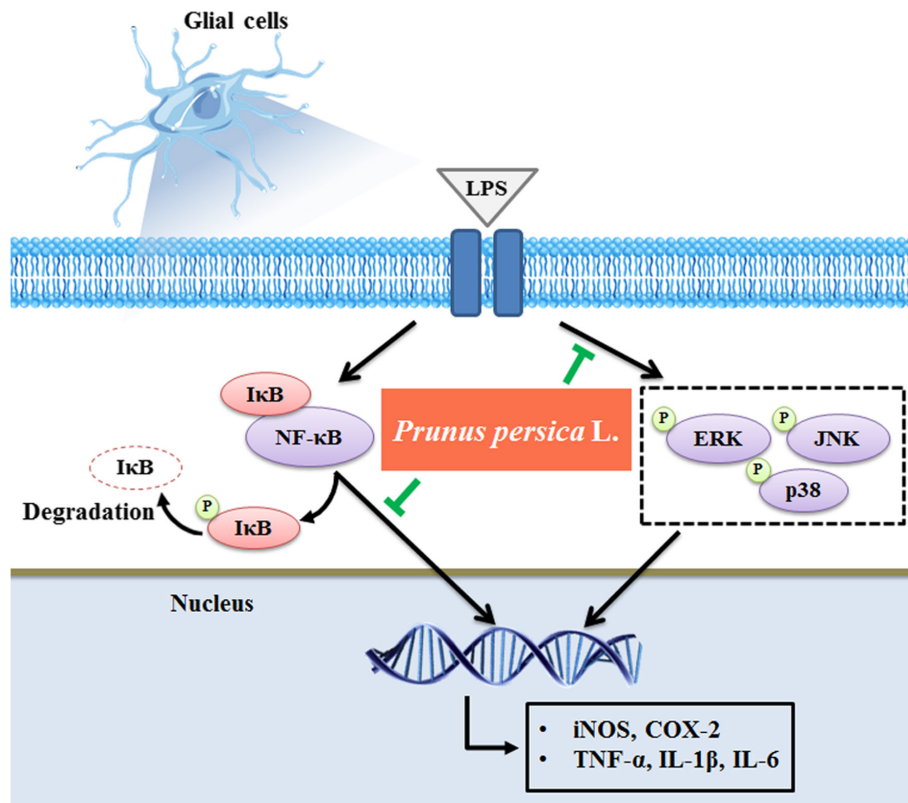

Supplement: Supplementary file 1 [file downloadSupplementary]
